# Supplementary material for: Parental traditional medicine use to children and its associated factors at University of Gondar Comprehensive Specialized Hospital: a cross-sectional study
Source: Frontiers journal article supplement (doi:10.3389/fpubh.2025.1531501), 2025-04-28
Supplement: Data_Sheet_1.pdf [file Data_Sheet_1.pdf]

### Supplementary Material: Questionnaire

#### Part I: Socio-demographic characteristics of children and parent

**Instruction:** Please circle the number in front of the option you choose

| No. | Variable                          | Coding categories                                                                                                                           |
|-----|-----------------------------------|---------------------------------------------------------------------------------------------------------------------------------------------|
| 101 | Sex of the child                  | 1. Male    0. Female                                                                                                                        |
| 102 | Age of the child                  | _____ (years)                                                                                                                               |
| 103 | Breast feeding status             | 1. Yes    0. No                                                                                                                             |
| 104 | Sex of the parent                 | 1. Male    0. Female                                                                                                                        |
| 105 | Age of the parent                 | _____ (years)                                                                                                                               |
| 106 | Relationship with the child       | 1. Mother<br>2. Father<br>3. Brother<br>4. Sister<br>5. Other                                                                               |
| 107 | Marital status                    | 1. Married<br>2. Single<br>3. Widowed<br>4. Divorced                                                                                        |
| 108 | Educational status of the parents | 1. Notable to read and write<br>2. Able to read and write<br>3. Primary school (1-8)<br>4. High school (9-12)<br>5. Above high school (>12) |
| 109 | Occupation of the parents         | 1. Housewife<br>2. Farmer<br>3. Merchant                                                                                                    |

|     |                                                       |                                                                                  |
|-----|-------------------------------------------------------|----------------------------------------------------------------------------------|
|     |                                                       | 4. Daily laborer<br>5. Governmental employed<br>6. Private organization employed |
| 110 | How many children do you have (up to 15 years)?       | _____                                                                            |
| 111 | Are you a member of community-based health insurance? | 1. Yes    0. No                                                                  |
| 112 | Residence                                             | 1. Urban    0. Rural                                                             |

**Part II:** Traditional medicine use practice to children

**Instruction:** Please circle the number in front of the option you choose

| No. | Variable No                                                                                          | Coding categories                                                                                               |
|-----|------------------------------------------------------------------------------------------------------|-----------------------------------------------------------------------------------------------------------------|
| 201 | Have you ever used any form of TM for your child (yes/no)?                                           | 1. Yes    0. No                                                                                                 |
| 202 | Have you used any form of TM for your child with in the last 12 months (yes/no)?                     | 1. Yes    0. No                                                                                                 |
| 203 | When have you used TM for your child in recent time?                                                 | 1. Within 1 months<br>2. Before a month but within 6 months<br>3. Before 6 months                               |
| 204 | For what purpose you used Traditional Medicine for your child (you can choose more than one option)? | 1. To promote health<br>2. To prevent illness<br>3. To treat illness/symptom relief<br>4. Others (specify)..... |
| 205 | What was the status of your child after using TM?                                                    | 5. Very poor<br>6. Poor<br>7. Fair<br>8. Good<br>9. Very good                                                   |
| 206 | What types of traditional medicine you used for your children (you can choose more than one option)? | 1. Religious/pray/Tsebel<br>2. Tonsillectomy<br>3. Teeth extraction                                             |

|     |                                                                                                                                           |                                                                                                                                                                      |
|-----|-------------------------------------------------------------------------------------------------------------------------------------------|----------------------------------------------------------------------------------------------------------------------------------------------------------------------|
|     |                                                                                                                                           | 4. Eye brown incision<br>5. Bone settler<br>6. Message<br>7. Functional foods<br>8. Herbal medicine (ginger, garlic, demacase, etc)<br>9. Any others (specify) _____ |
| 207 | What are the routes of administration of the traditional medicine you used for your child (you can choose more than one option)?          | 1. Orally<br>2. Bathing<br>3. Dermal<br>4. Inhalational<br>5. Any other (specify) _____                                                                              |
| 208 | What was your source of traditional medicine while you were using to your child/form where you get (you can choose more than one option)? | 1. Cultivated<br>2. Wild<br>3. From traditional healer<br>4. Prepared at home                                                                                        |
| 213 | Do you have a plan for using traditional medicine for your children in the future (yes/no)?                                               | 1. Yes 0. No                                                                                                                                                         |
| 214 | Do you encourage other persons to use traditional medicine for children (yes/no)?                                                         | 1. Yes 0. No                                                                                                                                                         |

**Part III:** Enabling and need factors for parental traditional medicine use to children

**Instruction:** Please circle the number in front of the option you choose.

| No. | Variable                                                                                                                            | Coding categories                                                                                                                           |
|-----|-------------------------------------------------------------------------------------------------------------------------------------|---------------------------------------------------------------------------------------------------------------------------------------------|
| 301 | What are your sources of information about the traditional medicine for your child is using? (You can choose more than one option)? | 1. Family/relative<br>2. Neighborhoods<br>3. Religious institutions<br>4. Friends<br>5. Television/internet/media,<br>6. Traditional healer |

|     |                                                                                                |                                                                                                                                                                                                                                                                                                                                                                                                                                        |
|-----|------------------------------------------------------------------------------------------------|----------------------------------------------------------------------------------------------------------------------------------------------------------------------------------------------------------------------------------------------------------------------------------------------------------------------------------------------------------------------------------------------------------------------------------------|
| 302 | For which child's symptom you used traditional medicine (you can choose more than one option)? | <ol style="list-style-type: none"> <li>1. Crying</li> <li>2. To increase immunity</li> <li>3. Evil eye disease</li> <li>4. Fever</li> <li>5. Liver disease</li> <li>6. Gastrointestinal disease (nausea vomiting, diarrhea)</li> <li>7. Headache</li> <li>8. Teething</li> <li>9. Dermatological problem (rash)</li> <li>10. Respiratory illness (cough, fast and noisy breathing)</li> <li>11. Any others? (Specify) _____</li> </ol> |
| 303 | For which type of a disease you have used TM for your child                                    | <ol style="list-style-type: none"> <li>1. For a disease which lasts &lt; 1 week</li> <li>2. For a disease which lasts 2-3 week</li> <li>3. For a disease which lasts 3-4 week</li> <li>4. For a disease which lasts &gt; 4 week</li> </ol>                                                                                                                                                                                             |
| 304 | What is your reasons for using Traditional Medicine?                                           | <ol style="list-style-type: none"> <li>1. Religious belief</li> <li>2. Family influence</li> <li>3. Cultural belief</li> <li>4. Referred by someone</li> <li>5. Being easily accessible</li> <li>6. When there is no improvement with modern medicine</li> <li>7. Any others? (specify) _____</li> </ol>                                                                                                                               |

**Part IV: Health care experience of the parents**

**Instruction:** Please circle the number in front of the option you choose.

| No. | Variable                                                                           | Coding categories                                                                                        |
|-----|------------------------------------------------------------------------------------|----------------------------------------------------------------------------------------------------------|
| 401 | Have you used any form of TM use for yourself with in the last 12 months (yes/no)? | 1. Yes 0. No                                                                                             |
| 402 | What was your level of satisfaction after using TM for yourself?                   | <ol style="list-style-type: none"> <li>1. Completely satisfied</li> <li>2. Somewhat satisfied</li> </ol> |

|     |                                                                       |                                                                                                                                                                                                                                                                                                                                                                                                                                        |
|-----|-----------------------------------------------------------------------|----------------------------------------------------------------------------------------------------------------------------------------------------------------------------------------------------------------------------------------------------------------------------------------------------------------------------------------------------------------------------------------------------------------------------------------|
|     |                                                                       | 3. Neutral<br>4. Somewhat dissatisfied<br>5. Completely dissatisfied                                                                                                                                                                                                                                                                                                                                                                   |
| 403 | What is your perception on the level of efficacy of TM?               | 1. Very poor<br>2. Poor<br>3. Fair<br>4. Good<br>5. Very good                                                                                                                                                                                                                                                                                                                                                                          |
| 404 | What was your reason for using TM than modern medicine for your-self? | 1. Believing there are some diseases which are not curb by modern medicine<br>2. When selected correctly it is effective<br>3. Satisfaction with Traditional Medicine<br>4. Cheap compared to modern medicine<br>5. The fear of drugs side effects<br>6. Dissatisfaction with modern medicine<br>7. Believing less efficacy of modern medicine<br>8. Having good knowledge about traditional medicine<br>9. Any others? (specify)----- |

**Part V: Disclosure regarding practice of TM use to children**

**Instruction:** Please circle the number in front of the option you choose.

| No  | Variable                                                                                                           | Coding categories                                                                   |
|-----|--------------------------------------------------------------------------------------------------------------------|-------------------------------------------------------------------------------------|
| 501 | If you used TM for your child, and a doctor or nurse asked you about the TM would you disclose (yes/no)?           | 1. Yes 0. No                                                                        |
| 502 | If you say no for question no “209” what was your reason for not disclosing (you can choose more than one option)? | 1. Not being asked by a healthcare professional<br>2. The staff will not understand |

|     |                                                                                                 |                                                           |
|-----|-------------------------------------------------------------------------------------------------|-----------------------------------------------------------|
|     |                                                                                                 | 3. The fear of the staff<br>4. It is not relevant to tell |
| 503 | If your Doctor/nurse asked you to stop giving traditional medicine to children, would you stop? | 1. Yes    0. No                                           |
| 504 | If your child getting sicker after giving traditional medicine would you stop to give?          | 1. Yes    0. No                                           |

**Thank you for your time!!!**
